# Supplementary material for: Metal–organic framework membranes with layered structure prepared within the porous support
Source: Royal Society of Chemistry journal article supplement (doi:10.1039/c3ra22733b), 2013-01-01
Supplement: c3ra22733b.pdf [file c3ra22733b.pdf]

## Supporting Information

Metal-organic framework membranes with layer structure prepared within the porous support

Nobuo Hara<sup>a,\*</sup>, Miki Yoshimune<sup>a</sup>, Hideyuki Negishi<sup>a</sup>, Kenji Haraya<sup>a</sup>, Shigeki Hara<sup>a</sup>,  
and Takeo Yamaguchi<sup>b</sup>

<sup>a</sup> Research Institute for Innovation in Sustainable Chemistry, National Institute of Advanced Industrial Science and Technology (AIST), Central 5, 1-1-1 Higashi, Tsukuba, Ibaraki 305-8565, JAPAN

\*n-hara@aist.go.jp

<sup>b</sup> Chemical Resources Laboratory, Tokyo Institute of Technology, 4259 Nagatsuta, Midori-ku, Yokohama 226-8503, JAPAN

### Experimental

#### *1. Preparation of Cu-BTC membrane and Cu-BTC powder*

The porous  $\alpha$ -alumina tube with a diameter of 3 mm, an average pore diameter of ca. 150 nm, and a thickness of ca. 350  $\mu$ m was supplied by NOK CORPORATION. The porous  $\alpha$ -alumina support was cut into pieces ca. 50 mm in length, washed with acetone, and dried under vacuum at 60°C for 12 h.

The solutions for the preparation of the Cu-BTC membrane were prepared as follows. A 0.3 M copper(II) nitrate trihydrate aqueous solution was prepared by dissolving 7.25 g copper(II) nitrate trihydrate (Wako Chemicals, Japan) in a total volume of 100 mL DI water. A 0.2 M 1,3,5-benzenetricarboxylic acid solution in ethanol was prepared by dissolving 4.20 g 1,3,5-benzenetricarboxylic acid (Sigma-Aldrich) in a total volume of 100 mL ethanol (Wako Pure Chemical Industries). One end of the porous  $\alpha$ -alumina tube support was sealed with molten glass to separate the inner and outer parts of the membrane. The hollow tube support was then filled with ca. 0.25 mL of 0.3 M copper(II) nitrate trihydrate aqueous solution, followed by vacuum treatment to completely fill the pores of the porous  $\alpha$ -alumina support. The hollow tube support was vertically placed with the sealed end down in a glass container filled with 20 mL of preheated 0.2 M 1,3,5-benzenetricarboxylic acid solution in ethanol at 75°C, while keeping the two solutions inside and outside the hollow tube support separated. The glass container was then placed in an autoclave and heated at 120°C for 2, 4, or 6 h. The

autoclave was allowed to cool to room temperature, and the hollow tube support was washed with aqueous ethanol solution (50 vol%) at 75°C for 24 h and dried at 90°C for 24 h in a vacuum oven.

Cu-BTC powder was prepared by mixing 25 mL of 0.3 M copper(II) nitrate trihydrate aqueous solution and 25 ml of 0.2 M 1,3,5-benzenetricarboxylic acid solution in ethanol. The mixture was placed in the autoclave and heated at 120°C for 6 h, i.e., the same conditions as those for the preparation of the Cu-BTC membrane. The autoclave was then allowed to cool down to room temperature. The blue powder was washed with ethanol several times and dried under vacuum at 90°C for 24 h.

### 2. X-ray diffraction analysis (XRD)

The crystal structure was determined by X-ray diffraction analysis with Cu-K $\alpha$  radiation (Bruker, D8 Advance). Diffraction patterns were measured at room temperature with a 2 $\theta$  ranging from 5° to 40° and a slow scan rate of 6 s/step. The porous  $\alpha$ -alumina support and the Cu-BTC membrane were split into small pieces and placed on the plastic cell for measurements.

### 3. SEM analysis

The surface structure and internal structure of the Cu-BTC membrane was analyzed by scanning electron microscopy (SEM, Hitachi High-Technologies Corporation, S-3400N) with energy dispersive X-ray analysis (SEM-EDX).

### 4. Gas permeation measurements

Single-component gas permeation properties of the Cu-BTC membrane were measured using He, H<sub>2</sub>, CO<sub>2</sub>, O<sub>2</sub>, N<sub>2</sub>, and CH<sub>4</sub> in the increasing order of kinetic diameter, as shown in Table S1. The measurements were conducted in-house under the steady-state conditions at 25°C with a vacuum time-lag method under a pressure difference of 1 atm.<sup>1</sup> The membrane was vacuum-dried at 90°C for over 24 h after fixing it on the permeation test cell for removing the residual water. Both the feed and permeate sides of the membrane were evacuated prior to each measurement.

Experimental data were compared with the calculated permeances based on H<sub>2</sub> permeance under the Knudsen diffusion mechanism using the following equation:

$$P_{i,K} = P_{H_2} \sqrt{M_{H_2}/M_i},$$

where  $P_{i,K}$  is the predicted permeance of gas molecule  $i$ ,  $P_{H_2}$  is the H<sub>2</sub> permeance,  $M_{H_2}$

is the molecular weight of H<sub>2</sub>, and  $M_i$  is the molecular weight of gas molecule  $i$ . The ideal H<sub>2</sub> selectivity,  $\alpha$ , was obtained using the following equation:

$$\alpha = \frac{P_{H_2}}{P_i},$$

where  $P_{H_2}$  is the permeance of H<sub>2</sub>, and  $P_i$  is the permeance of gas molecule  $i$ .

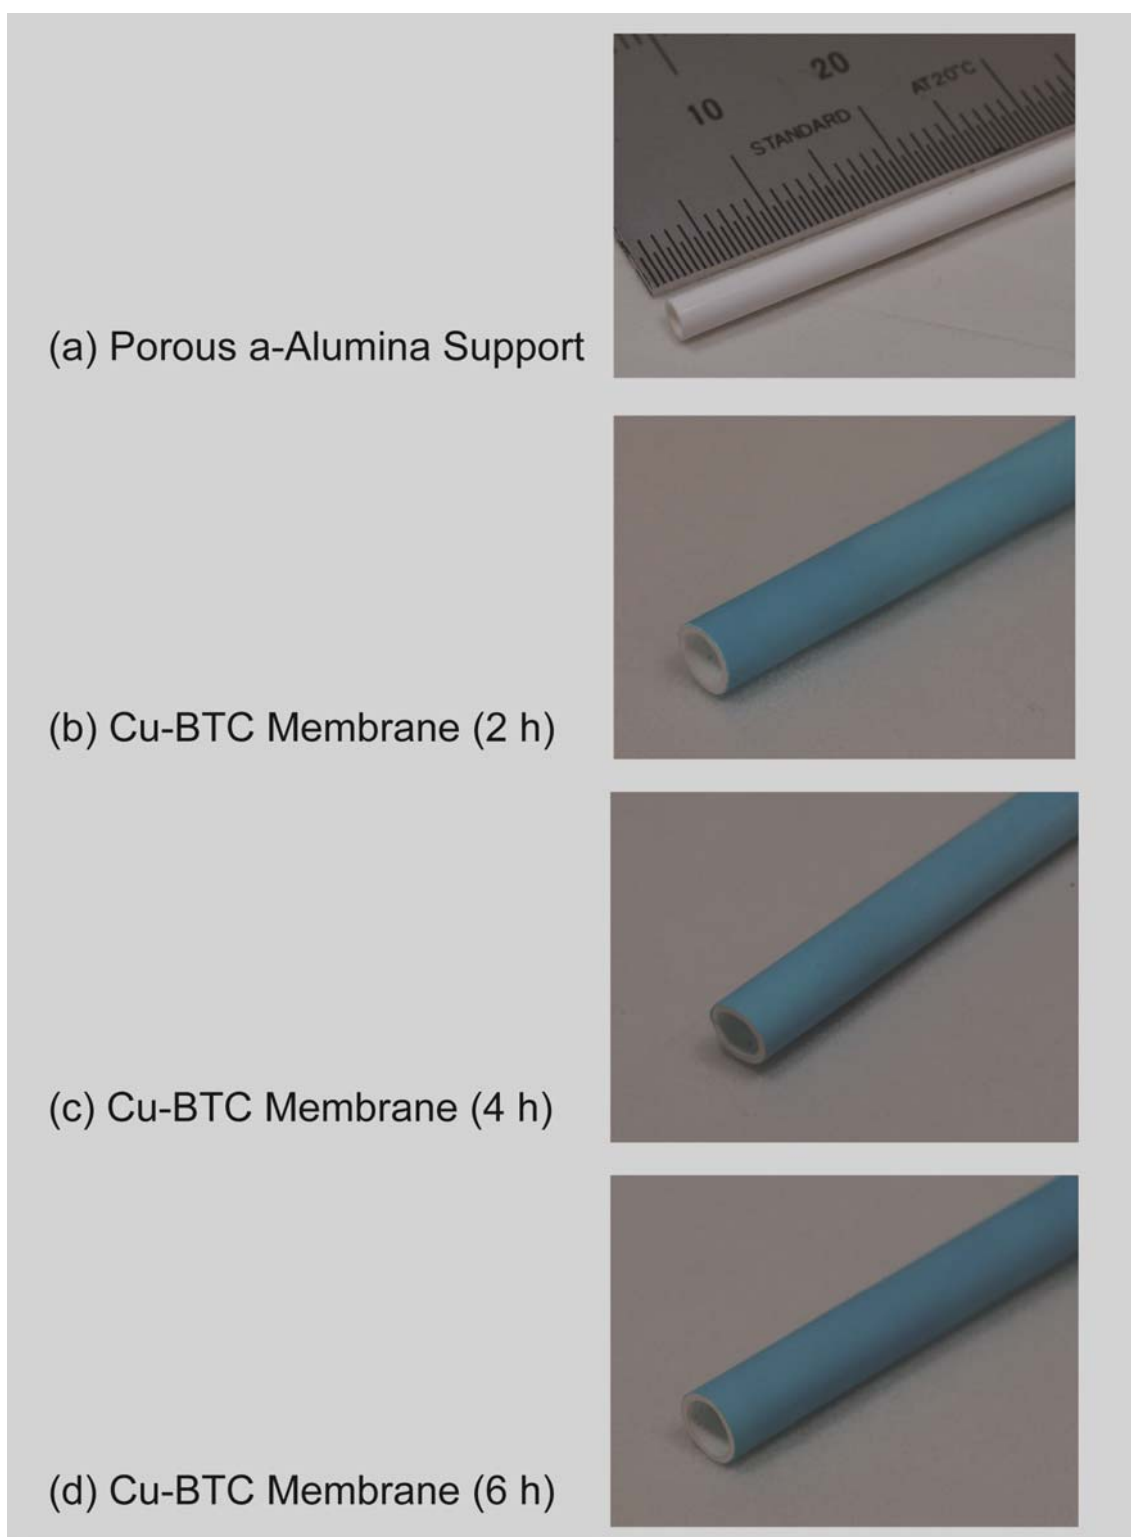

**Fig. S1** Photographs of (a) porous  $\alpha$ -alumina support, (b) Cu-BTC membrane (2 h preparation time), (c) Cu-BTC membrane (4 h preparation time) and (d) Cu-BTC membrane (6 h preparation time).

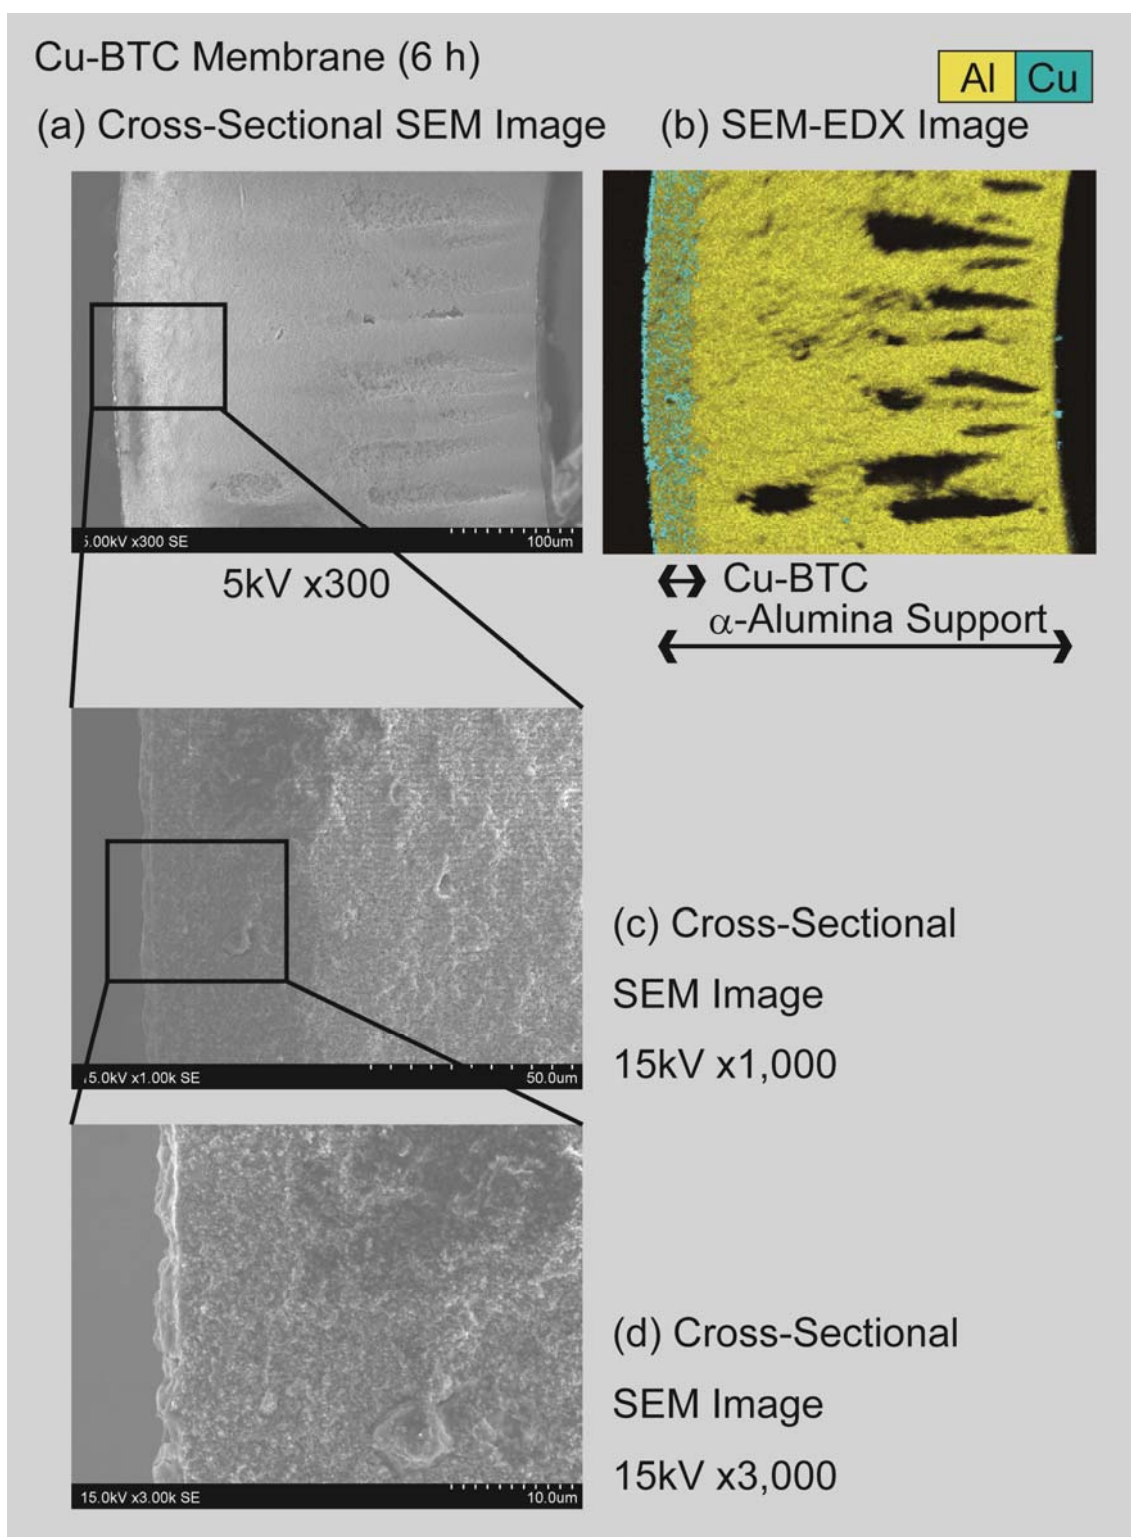

**Fig. S2** (a) Cross-sectional SEM image of the Cu-BTC membrane (6 h preparation time) at the magnification of  $\times 300$ , and (b) the SEM-EDX mapping image for the same area as in (a). Cross-sectional SEM images at the magnification of (c)  $\times 1,000$ , (d)  $\times 3,000$ .

### Cu-BTC Membrane (6 h) SEM Image of the outer surface

(a) 1kV x1,000

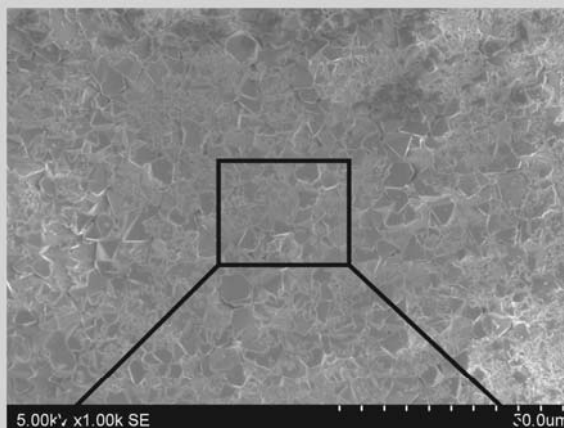

(b) 5kV x5,000

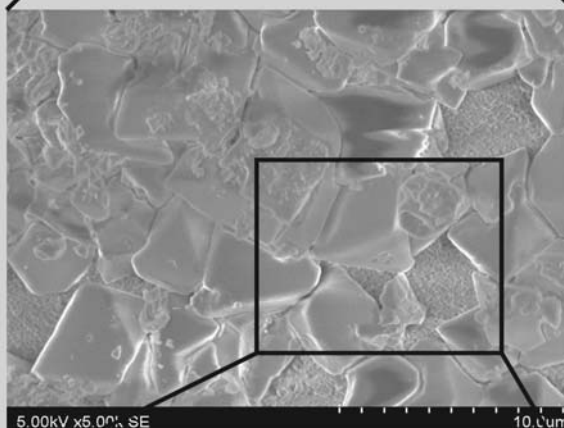

Cu-BTC  
 $\alpha$ -Alumina Support

(c) 5kV x10,000

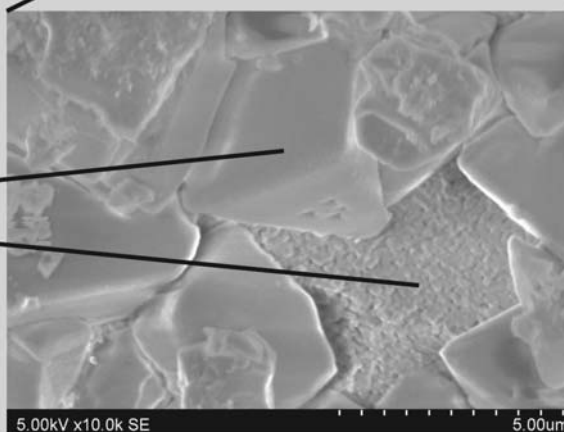

**Fig. S3** SEM images of the outer surface of the Cu-BTC membrane (6 h preparation time) at the magnification of (a)  $\times 1,000$ , (b)  $\times 5,000$ , (c)  $\times 10,000$ .

Cu-BTC Membrane (6 h)  
SEM Image of the inner surface

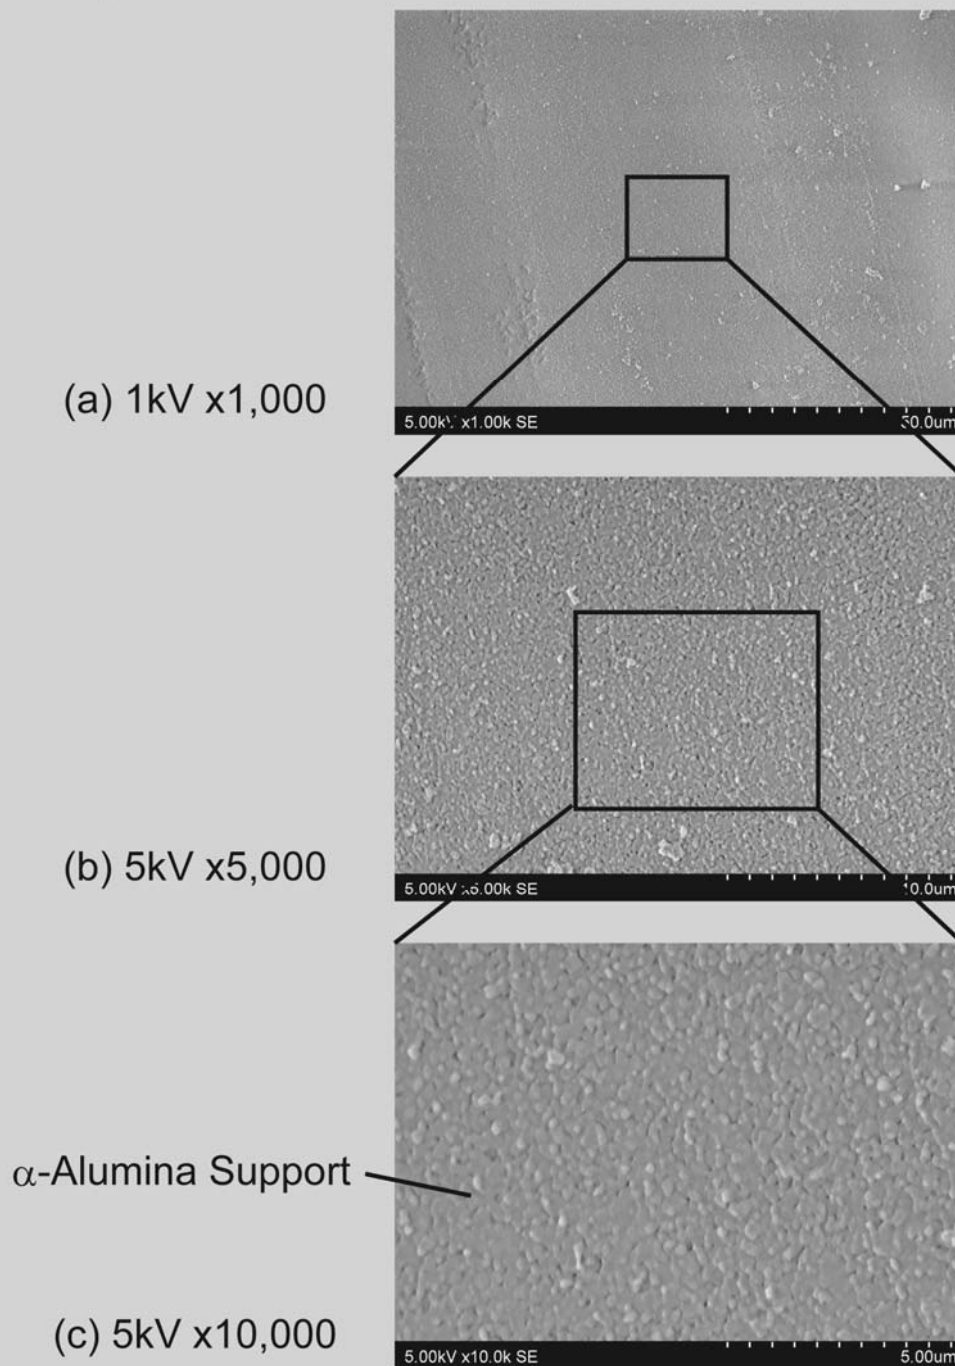

**Fig. S4** SEM images of the inner surface of the Cu-BTC membrane (6 h preparation time) at the magnification of (a)  $\times 1,000$ , (b)  $\times 5,000$ , (c)  $\times 10,000$ .

**Table S1** Results of single-component gas permeation measurements at 25°C.

| Gas Molecule                                                         |                                                                   | He                      | H <sub>2</sub>          | CO <sub>2</sub>         | O <sub>2</sub>           | N <sub>2</sub>           | CH <sub>4</sub>          |
|----------------------------------------------------------------------|-------------------------------------------------------------------|-------------------------|-------------------------|-------------------------|--------------------------|--------------------------|--------------------------|
| Properties of Gas Molecules                                          |                                                                   |                         |                         |                         |                          |                          |                          |
| Kinetic Diameter [nm]                                                |                                                                   | 0.26                    | 0.29                    | 0.33                    | 0.35                     | 0.36                     | 0.38                     |
| Knudsen diffusion selectivity of H <sub>2</sub> [-]                  |                                                                   | 1.41                    | 1                       | 4.67                    | 3.98                     | 3.73                     | 2.82                     |
| Experimental Results                                                 |                                                                   |                         |                         |                         |                          |                          |                          |
| Cu-BTC membrane (2 h)                                                | Permeance [mol m <sup>-2</sup> s <sup>-1</sup> Pa <sup>-1</sup> ] | 7.46 × 10 <sup>-8</sup> | 9.98 × 10 <sup>-8</sup> | 2.04 × 10 <sup>-8</sup> | 1.87 × 10 <sup>-8</sup>  | 2.03 × 10 <sup>-8</sup>  | 2.49 × 10 <sup>-8</sup>  |
|                                                                      | Ideal H <sub>2</sub> selectivity [-]                              | 1.34                    | 1                       | 4.90                    | 5.34                     | 4.92                     | 4.01                     |
| Cu-BTC membrane (4 h)                                                | Permeance [mol m <sup>-2</sup> s <sup>-1</sup> Pa <sup>-1</sup> ] | 1.69 × 10 <sup>-8</sup> | 2.05 × 10 <sup>-8</sup> | 5.36 × 10 <sup>-9</sup> | 1.48 × 10 <sup>-9</sup>  | 7.16 × 10 <sup>-10</sup> | 8.31 × 10 <sup>-10</sup> |
|                                                                      | Ideal H <sub>2</sub> selectivity [-]                              | 1.21                    | 1                       | 3.82                    | 13.9                     | 28.6                     | 24.6                     |
| Cu-BTC membrane (6 h)                                                | Permeance [mol m <sup>-2</sup> s <sup>-1</sup> Pa <sup>-1</sup> ] | 7.67 × 10 <sup>-9</sup> | 9.03 × 10 <sup>-9</sup> | 2.45 × 10 <sup>-9</sup> | 5.57 × 10 <sup>-10</sup> | 7.34 × 10 <sup>-11</sup> | 5.90 × 10 <sup>-11</sup> |
|                                                                      | Ideal H <sub>2</sub> selectivity [-]                              | 1.12                    | 1                       | 3.69                    | 16.2                     | 123                      | 153                      |
| Reference Data of Single Gas Permeance for Previous Cu-BTC membranes |                                                                   |                         |                         |                         |                          |                          |                          |
| Zhou et al. <sup>2</sup> (40°C)                                      | Permeance [mol m <sup>-2</sup> s <sup>-1</sup> Pa <sup>-1</sup> ] | -                       | 7.25 × 10 <sup>-8</sup> | 5.50 × 10 <sup>-9</sup> | -                        | 1.01 × 10 <sup>-8</sup>  | 1.25 × 10 <sup>-8</sup>  |
|                                                                      | Ideal H <sub>2</sub> selectivity [-]                              | -                       | 1                       | 13.18                   | -                        | 7.18                     | 5.80                     |
| Nan et al. <sup>3</sup> (25°C)                                       | Permeance [mol m <sup>-2</sup> s <sup>-1</sup> Pa <sup>-1</sup> ] | -                       | 7.48 × 10 <sup>-7</sup> | 1.48 × 10 <sup>-7</sup> | -                        | 2.00 × 10 <sup>-7</sup>  | 2.57 × 10 <sup>-7</sup>  |
|                                                                      | Ideal H <sub>2</sub> selectivity [-]                              | -                       | 1                       | 5.1                     | -                        | 3.7                      | 2.9                      |
| Guerrero et al. <sup>4</sup> (25°C)                                  | Permeance [mol m <sup>-2</sup> s <sup>-1</sup> Pa <sup>-1</sup> ] | -                       | 1.09 × 10 <sup>-6</sup> | 5.0 × 10 <sup>-7</sup>  | -                        | 5.0 × 10 <sup>-7</sup>   | 8.0 × 10 <sup>-7</sup>   |
|                                                                      | Ideal H <sub>2</sub> selectivity [-]                              | -                       | 1                       | 2.2                     | -                        | 2.2                      | 1.4                      |
| Guo et al. <sup>5</sup> (25°C)                                       | Permeance [mol m <sup>-2</sup> s <sup>-1</sup> Pa <sup>-1</sup> ] | -                       | 1.27 × 10 <sup>-6</sup> | 2.81 × 10 <sup>-7</sup> | -                        | 2.76 × 10 <sup>-7</sup>  | 1.63 × 10 <sup>-7</sup>  |
|                                                                      | Ideal H <sub>2</sub> selectivity [-]                              | -                       | 1                       | 4.52                    | -                        | 4.60                     | 7.80                     |

References

1. M. Yoshimune, I. Fujiwara and K. Haraya, *Carbon*, 2007, **45**, 553-560.
2. S. Y. Zhou, X. Q. Zou, F. X. Sun, F. Zhang, S. J. Fan, H. J. Zhao, T. Schiestel and G. S. Zhu, *J. Mater. Chem.*, 2012, **22**, 10322-10328.
3. J. P. Nan, X. L. Dong, W. J. Wang, W. Q. Jin and N. P. Xu, *Langmuir*, 2011, **27**, 4309-4312.
4. V. V. Guerrero, Y. Yoo, M. C. McCarthy and H. K. Jeong, *J. Mater. Chem.*, 2010, **20**, 3938-3943.
5. H. L. Guo, G. S. Zhu, I. J. Hewitt and S. L. Qiu, *J. Am. Chem. Soc.*, 2009, **131**, 1646-1647.
